# Supplementary material for: Mycobacterium africanum (Lineage 6) shows slower sputum smear conversion on tuberculosis treatment than Mycobacterium tuberculosis (Lineage 4) in Bamako, Mali
Source: PLoS One. 2018 Dec 12;13(12):e0208603. doi: 10.1371/journal.pone.0208603 (PMC6291124; doi:10.1371/journal.pone.0208603)
Supplement: S1 File — Data are shown together with the positive and negative control results. (XLSX) [file pone.0208603.s001.xlsx]

## Sheet: Sheet1
	S4 File. Supplemental data of the 25 isolates tested with 24 locus MIRU-VNTR
		CORRESPONDING SPOLIGOTYPING RESULTS		MIRU-VNTR RESULTS
	Sample ID	Spoligopattern	SPOTCLUST Strain Family Designation	0154	0424	0577	0580	0802	0960	1644	1955	2059	2163b	2165	2347	2401	2461	2531	2687	2996	3007	3171	3192	3690	4052	4156	4348	MIRU-VNTR RESULT	FINAL CLASSIFICATION
	293	nnnnnnnnnnnnnnnnnnnnnnnnnnnnnnnnoonnnnnnnnn	M. tuberculosis Family33 with prob 0.99	2			2	1 + 2				2		3	3 + 4		2	5	1 + 2		3	2 + 3		3 + 4			2 + 3	Mixed	Unclassifiable
	528	noononoonnnnoooonnnooonnnnnnnonooonnnnnnnnn	M. tuberculosis Family33 with prob 0.99	2	4	4	2	3		3		2			4	4	2	5	1	6	3	3	5	3		2	3	MTB. Beijing	Lineage 2
	530	nnnnnnoonnnnnnnnnnnnnnoonooonnnnnnnnnnonnon	M. tuberculosis Family33 with prob 0.99	2	2	4	2	1	3	3	3	1	6	4	4	2	2	5	1	5	3	3	3	3	5	2	2	MTB. Cameroon	Lineage 4
	685	nnnooooooooooooooooooooooooooooooonnnnonnnn	M. tuberculosis Family36 with prob 0.86	2	3	5	1	2	5	4	4	2	5	6	3	4	4	4	2	4	3	3	5	4	6	3	2	M. africanum type 2	Lineage 6
	920	nnnnnnnnnnnnnnnnnnnnnnnnnnnnnnnnnnnnnnnnnnn	M. tuberculosis Family33 with prob 0.99	2	2	3	2	2 + 5	3	3	4	2	3	3	4	4	2	5	1	4	3	2	3	3	6	1	3	MTB. Ghana	Mixed
	1208	nnnnnnnpnnnnnnnnnnnnnnppnnnnnnnnnnnnnnpnnnn	M. tuberculosis Family33 with prob 0.99	2	3	5	2	2	5	4	4	2	5	6	3	4	2 + 4	4	2	4	3	3	5	3	6	1	2	M. africanum type 2	Lineage 6
	1221	nnnnnnnpnnnnnnnnnnnnnnppnnnnnnnnnnnnnnnnnnn	M. tuberculosis Family33 with prob 0.99	2	1	4	2	5		3	2	2	3	3	4	2	2	6	1	5	3	3	3	6	5	2	2	Unclassifiable	Unclassifiable
	1235	nnnnnnnnnnnnnnnnnnnnnnppnnnnnnnnnnnnnnpnnnn	M. tuberculosis Family33 with prob 0.99	2	2	4	2					1	6		4		2	5	1		3	3	3	3	6		2	MTB. Cameroon	Lineage 4
	1311	noonnnnnnnnnnnnnnonnnnnooooonoooooooooooooo	M. tuberculosis Family34 with prob 0.92	2	4	3	2	3	5	3	2	2	1	3	4	4	2	5	1	3	3	3	3	3	3	3	2	MTB. Haarlem	Lineage 4
	1331	nonnonnnnnnnnnonnnnnnnoonnnnnnnnnnnnnnnnnnn	M. tuberculosis Family33 with prob 1	2	2 + 3	4 + 5	1	2		3	3	1	3	4 + 6	3 + 4	2 + 4	2 + 4	4	1 + 2	4	3	3	3	4	2 + 5		2	Mixed	Unclassifiable
	1333	noononoonnnnoooonnnooonnnnnnnonooonnnnnnnnn	M. tuberculosis Family33 with prob 0.99	2	4	4	2	3	3	3	4	2	6	4	4	4	2	5	1	6	3	3	5	3	7	2	3	MTB. Beijing	Lineage 2
	1337	nonnonnnnnnnnnonnnnnnonnnnnnnnnoonnnnnnnnnn	M. tuberculosis Family33 with prob 0.99	2	2	3 + 4	2	2 + 3						3 + 4	4	2 + 4	2	5				2 + 3	3	3	4 + 5		2 + 3	Mixed	Unclassifiable
	1339	nnnnonnnnnnnnnonnnnnnnnnnnnnnnnoonnonnnnnnn	M. tuberculosis Family33 with prob 0.99	2	2	4	2	3		3	3	1	6	4	4	2	2	5	1	5	3	3	3	3 + 4	5	2	2	MTB. Cameroon	Lineage 4
	1359	nnnnnnnpppppnnnnnnnnppppnnnnnnnnppnnnnnnnnn	M. tuberculosis Family33 with prob 0.99	2	4	4	2	3	3	3	4	2	2+3	2	4	4	2	5	1	6	3	3	5	3	7	2	3	M. africanum type 1	Lineage 5
	1392	nnnnnnnnnnnnnnnnnnnnnnnnnnnnnnnnnnnonnnnnnn	M. tuberculosis Family33 with prob 0.99	2	2 + 3	4 + 5	2 + 10s	1 + 2				1			3 + 4	2 + 4	2	4 + 5	1 + 2		3	3		1 + 3	5	2	2	Mixed	Unclassifiable
	1403	nonnonnononnnoonnnnnoonnnnnnnnnonnnnononnnn	M. tuberculosis Family33 with prob 0.99	2	2	5	2	1	7	2	4	2	4	7	3	4	4	4	2	4	3	3	5	4	1	3	2	M. africanum type 2	Lineage 6
	1405	nonoononnnnnnoonnnnnnnnnnnoononnnnnoononnon	M. tuberculosis Family33 with prob 0.89	2	4	2	2	3	9	2 + 6	4	2	2	4	4	2	2	5	1	7	3	3	5	3	6	4	3	M. africanum type 2	Lineage 6
	1407	nonnonnnnnnnnnonnnnnnnnnnnnnnonoonnonnonnnn	M. tuberculosis Family33 with prob 0.99	2	3	5	2	2	5	4	4	2	5	6	3	4	3	4	2	3	3	3	5	4	2	3	2	M. africanum type 2	Lineage 6
	1444	nnnnnnnnnnnnnnnnnnnnnnnnnnnnnnnnnpnnnnnnnnn	M. tuberculosis Family33 with prob 0.99	2	2	4	2 + 5	3							3 + 4			6			4				5	1	3	Mixed	Unclassifiable
	BCG	nnonnnnnonnnnnnonnnnnnnnnnnnnnnnnnnnnnooooo	M. bovis-BCG family (prob 0.999)	2	0	6	2s	2	2	3	1	2	3	5	2	2	5	4	2	5	3	3	3	2	5	0	2
	Tneg
				Legend
					non amplified marker after two rounds of independant PCR
					Double alleles that were confirmed by two independant rounds of PCR
				Tneg	negative control
				BCG	positive control
